# Supplementary material for: MDM2 SNP309, gene-gene interaction, and tumor susceptibility: an updated meta-analysis
Source: BMC Cancer. 2011 May 29;11:208. doi: 10.1186/1471-2407-11-208 (PMC3115916; doi:10.1186/1471-2407-11-208)
Supplement: Additional file 1 — Characteristics of included studies investigating the association between MDM2 SNP309 and tumor risk. [file 1471-2407-11-208-S1.XLS]

## Sheet: Sheet1
Additional file 1. Charcteristics of included studies investigateing the association between MDM2 SNP309 and tumor risk
First author	Year	Tumor type	Racial descent	Case*	Control*	MAF	p53 mutation status	Interaction with p53 Arg72Pro
Cattelani S[12]	2008	Neuroblastoma	European	95/103/41	125/90/22	0.28	No	No
EI Hallani S[13]	2007	Glioblastoma multiforme	European	98/114/42	109/96/33	0.34	No	No
Khatri RG[14]	2008	Glioblastoma multiforme	mixed	5/79/14	23/74/5	0.41	No	No
Perfumo C[15]	2009	Neuroblastoma	European	173/241/83	178/231/62	0.38	No	No
Tsuiki H[16]	2007	Glioma	Asian	62/126/66	15/18/17	0.52	Yes*	No
Boersma BJ[17]	2006	Breast cancer	African	125/39/1	151/24/3	0.08	Yes	No
			European	60/42/23	60/63/13	0.33
Campbell IG[18]	2006	Breast cancer	European	132/160/59	105/111/42	0.38	No	No
		Ovarian cancer	European	117/133/52	105/111/42	0.38
Cox DG[19]	2007	Breast cancer	mixed	656/674/189	958/1027/286	0.35	No	Yes*
Krekac D[20]	2008	Breast cancer	European	62/80/16	61/71/17	0.35	Yes*	No
Lang A[21]	2009	Breast cancer	European	52/57/14	68/60/18	0.33	No	Yes
Lum SS[22]	2008	Breast cancer	Asian	75/204/123	145/308/152	0.51	No	No
Ma H[23]	2006	Breast cancer	Asian	85/196/85	145/308/152	0.51	No	No
Millikan RC[24]	2006	Breast cancer	African	594/158/15	542/121/17	0.11	Yes	No
			European	516/573/181	474/478/181	0.37
Onat OE[25]	2006	Breast cancer	European	13/36/26	29/57/17	0.44	No	No
Paulin PE[26]	2008	Breast cancer	European	118/141/40	123/116/36	0.34	No	No
Petenkaya A[27]	2006	Breast cancer	European	42/124/57	32/79/38	0.52	No	No
Singh V[28]	2008	Breast cancer	Asian	25/48/31	25/47/33	0.54	No	Yes*
Sun YF[29]	2009	Breast cancer	Asian	18/80/26	25/56/16	0.45	No	No
Wasielewski M[30]	2006	Breast cancer	European	111/185/47	38/67/21	0.43	No	No
Wilkening S[31]	2006	Breast cancer	European	218/243/88	445/470/150	0.36	No	No
Wilkening S[32]	2007	basal cell carcinoma of the skin	European	215/232/62	193/251/69	0.38	No	No
Yarden RI[33]	2008	Breast cancer	European	49/77/61	30/68/40	0.54	No	No
Alhopuro P[34]	2005	Colorectal cancer	European	334/465/170	56/98/31	0.43	No	No
		Squamous cell carcinoma of the head and neck	European	58/75/24	56/98/31	0.43
		Uterine leiomyosarcoma	European	21/36/11	56/98/31	0.43
Alazzouzi H[35]	2006	Colorectal cancer	Mixed	66/69/17	97/63/24	0.3	Yes*	No
Liu JN[36]	2008	Colorectal cancer	Asian	216/478/306	385/650/265	0.45	No	No
Menin C[37]	2006	Colorectal cancer	European	69/70/14	40/40/12	0.35	Yes*	No
Sotamaa K[38]	2005	Colorectal cancer	European	38/66/17	78/94/37	0.4	No	Yes
			Mixed	2015-11-04	45/52/21	0.4
Cao YY[39]	2007	Esophageal squamous cell carcinoma	Asian	50/170/131	117/299/226	0.58	No	No
		Gastric cardia adenocarcinoma	Asian	21/91/100	117/299/226	0.58
Hong Y[40]	2005	Esophageal squamous cell carcinoma	Asian	203/348/207	418/711/291	0.46	No	Yes
Huang SF[41]	2009	Oral squamous cell carcinomas	Asian	80/176/95	274/653/345	0.53	Yes*	No
Misra C[42]	2009	Oral cancer	Asian	70/147/80	59/181/88	0.54	No	Yes
Zhou G[43]	2007	Nasopharyngeal carcinoma	Asian	151/374/278	191/348/224	0.52	No	No
Do TN[44]	2009	Acute lymphoblastic leukemia	European	46/55/13	187/167/60	0.35	No	Yes
Phang BH[45]	2008	Leukemia	Asian	17/13/14	30/80/50	0.56	No	No
Xiong XJ[46]	2009	Acute myeloid leukemia	Asian	32/123/76	35/68/25	0.46	No	Yes*
Zenz T[47]	2008	Chronic lymphocytic leukemia	European	239/299/79	445/470/150	0.36	No	No
Dharel N[48]	2006	Hepatocellular carcinoma	Asian	31/95/61	9/26/13	0.54	No	No
Ezzikouri S[49]	2009	Hepatocellular carcinoma	European	39/46/11	120/89/13	0.26	No	No
Leu JD[50]	2009	Hepatocellular carcinoma	Asian	11/37/10	35/80/23	0.46	No	No
Yoon YJ[51]	2008	Hepatocellular carcinoma	Asian	45/125/117	83/132/81	0.5	No	Yes*
Hu Z[52]	2006	Lung cancer	Asian	166/373/178	274/538/271	0.5	No	No
Li G[53]	2006	Lung cancer	European	419/472/135	408/573/164	0.39	No	No
Lind H[54]	2006	Lung cancer	European	130/156/55	161/207/44	0.36	Yes*	No
Liu G[55]	2008	Lung cancer	European	702/802/283	530/631/199	0.38	No	No
Mittelstrass K[56]	2008	Lung cancer	European	270/293/70	547/598/149	0.35	No	No
Mu XH[57]	2009	Lung cancer	Asian	21/98/32	32/65/17	0.43	No	No
Park SH[58]	2006	Lung cancer	Asian	113/280/189	122/229/161	0.54	No	No
Pine SR[59]	2006	Lung cancer	African	111/20/2	203/47/5	0.11	No	No
			European	150/167/54	182/187/52	0.35
Zhang X[60]	2006	Lung cancer	Asian	249/561/296	418/711/291	0.46	No	Yes*
Hirata H[61]	2007	Renal cell carcinoma	Asian	49/89/62	62/98/40	0.45	No	No
Horikawa Y[62]	2008	Transitional cell carcinoma of the bladder	Asian	44/116/67	55/132/79	0.55	No	No
Stoehr R[63]	2008	Prostate cancer	European	61/66/18	41/64/19	0.41	No	No
Kang S[64]	2009	Ovarian cancer	Asian	77/120/60	56/121/80	0.55	No	No
Ueda M[65]	2009	Ovarian cancer	Asian	21/45/19	20/66/22	0.51	No	No
		Cervical cancer	Asian	20/47/21	20/66/22	0.51
		Endometrial cancer	Asian	26/54/39	20/66/22	0.51
Asomaning KA[66]	2008	Pancreatic cancer	European	71/129/32	174/165/33	0.31	No	No
Grochola LF[67]	2010	Pancreatic ductal adenocarcinoma	European	35/53/15	185/234/80	0.39	Yes	No
Nan H[68]	2009	Basal cell carcinoma of the skin	Mixed	119/127/43	380/356/115	0.34	No	No
		Melanoma	Mixed	97/92/29	380/356/115	0.34
		Quamous cell carcinoma of the skin	Mixed	117/119/45	380/356/115	0.34
Cho YG[69]	2008	Gastric carcinoma	Asian	64/110/65	61/152/86	0.54	No	No
Ohmiya[70]	2006	Gastric carcinoma	Asian	98/188/124	99/241/98	0.5	Yes	No
Wang X[71]	2009	Gastric carcinoma	Asian	74/120/66	82/141/37	0.41	No	No
Yang M[72]	2007	Gastric cardia adenocarcinoma	Asian	107/250/143	298/498/204	0.45	No	Yes*
Ashton KA[73]	2009	Endometrial cancer	European	78/84/29	128/126/37	0.34	No	No
Meissner Rde V[74]	2007	Cervical cancer	Mixed	27/39/6	34/50/16	0.41	No	No
Nunobiki O[75]	2009	Endometrial cancer	Asian	24/44/34	17/59/19	0.51	No	Yes
Terry K[76]	2008	Endometrial cancer	European	216/216/84	596/575/145	0.33	No	No
Walsh CS[77]	2007	Endometrial cancer	Mixed	28/27/18	32/38/9	0.35	No	No
*studies included in the interaction analysis
